# Supplementary material for: Role of MicroRNA-145 in DNA Damage Signalling and Senescence in Vascular Smooth Muscle Cells of Type 2 Diabetic Patients
Source: MDPI journal article supplement (doi:10.3390/cells10040919), 2021-04-16

FIGURE 1

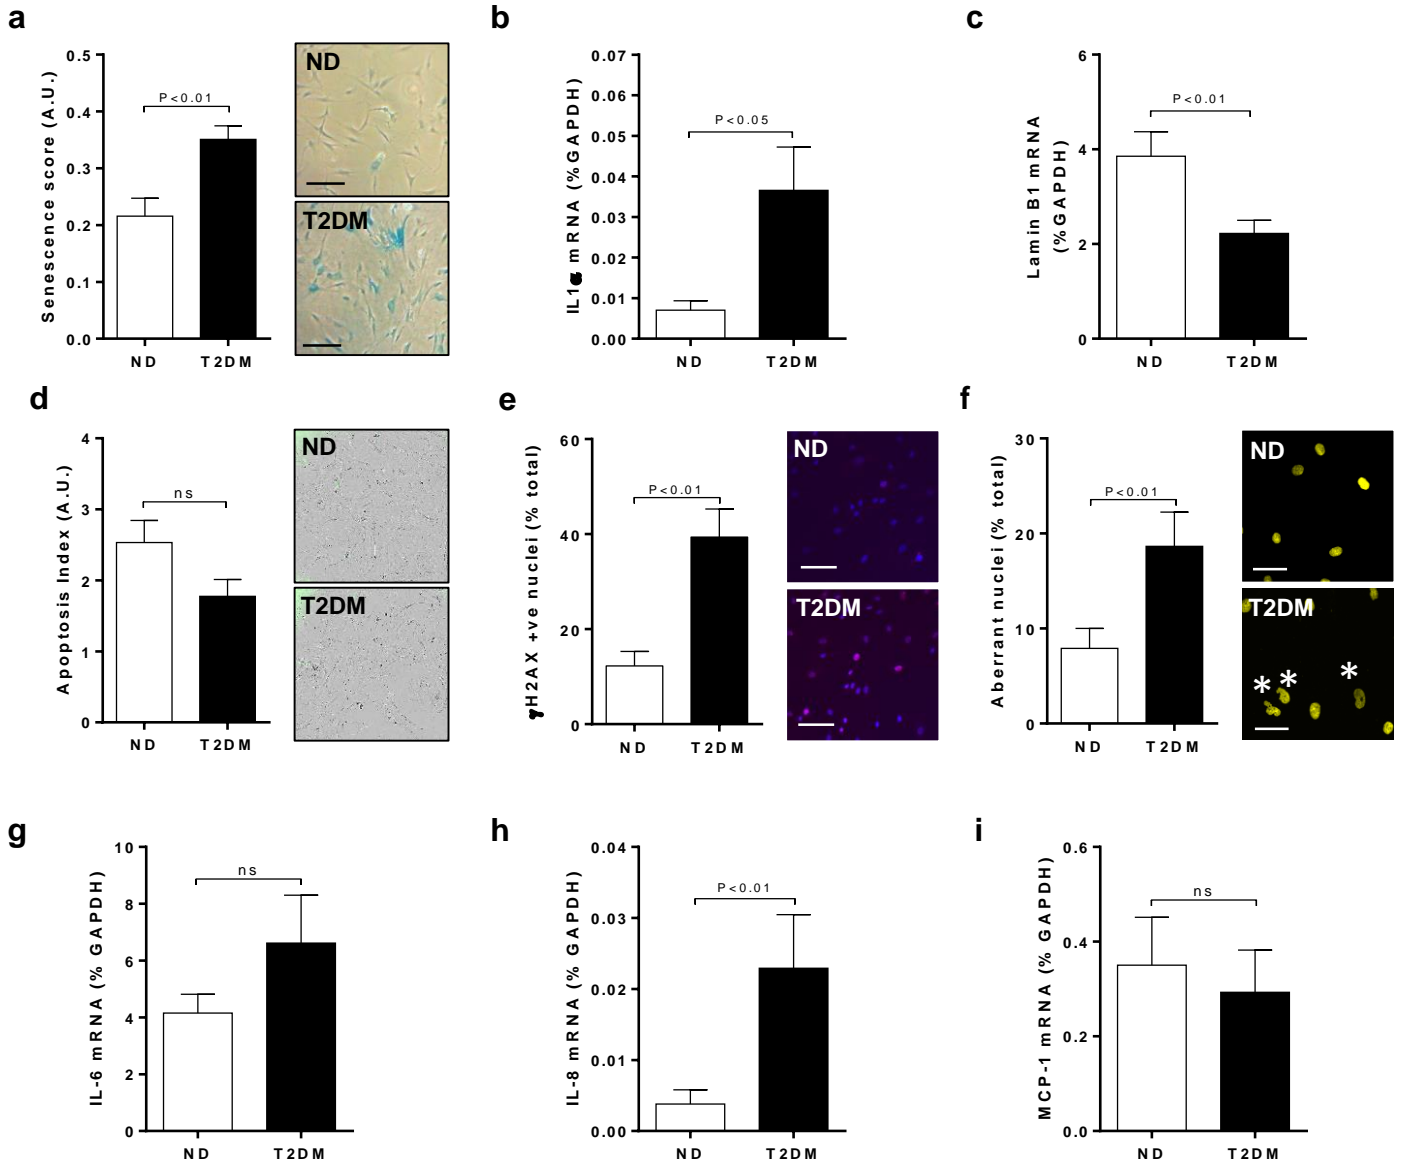

SUPPLEMENTARY FIGURE 1

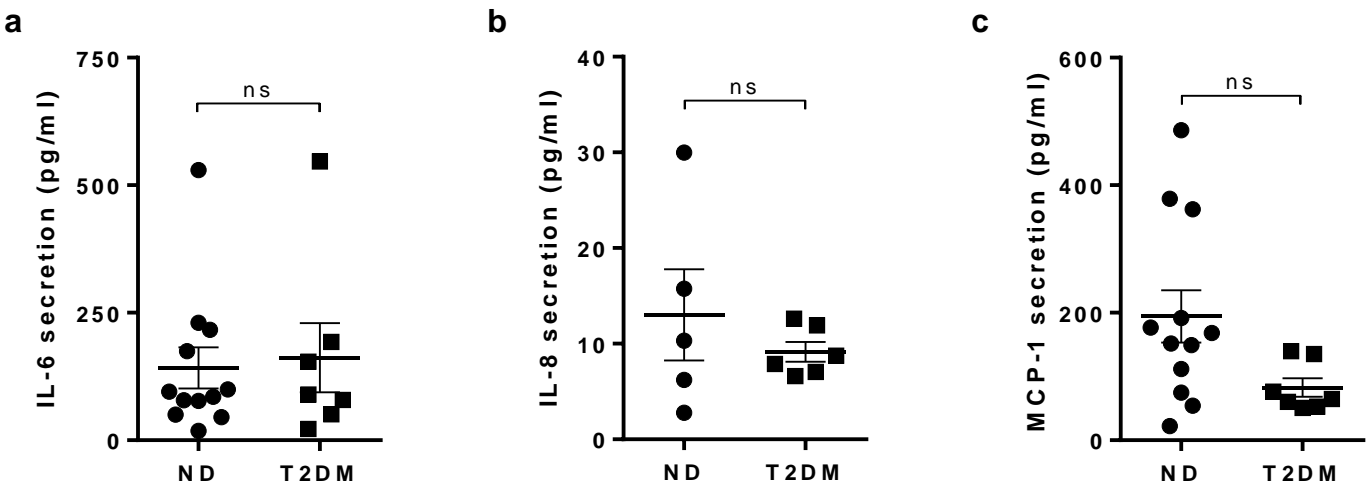

**Supplementary Figure 1: Secretion of senescence-associated inflammatory cytokines.** Cells were cultured in serum free media for 72 h, and the basal secretion of senescence-associated inflammatory cytokines quantified. (A) IL-6, (B) IL-8 and (C) MCP-1 were measured using ELISA (all n=5-12).

**FIGURE 2**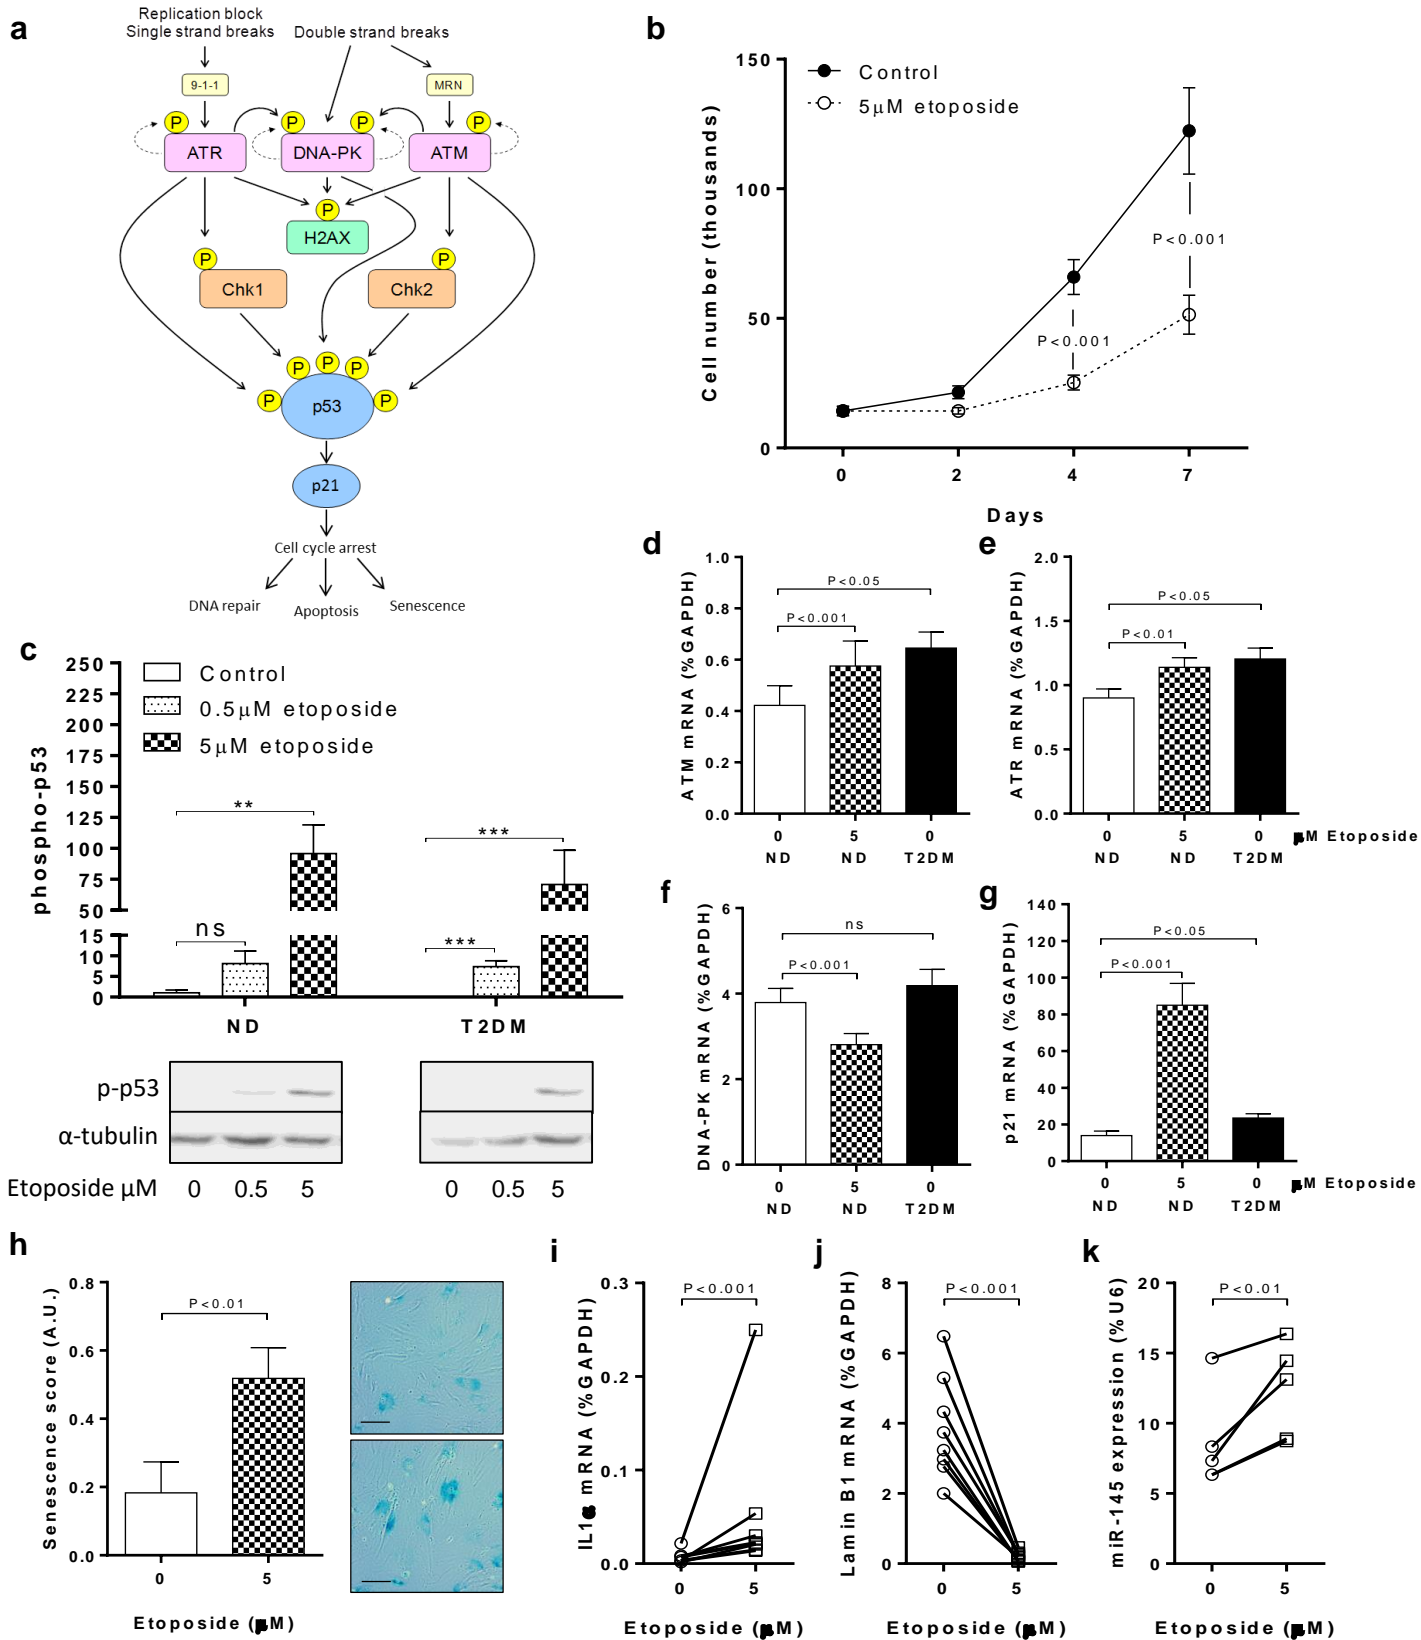

# SUPPLEMENTARY FIGURE 2

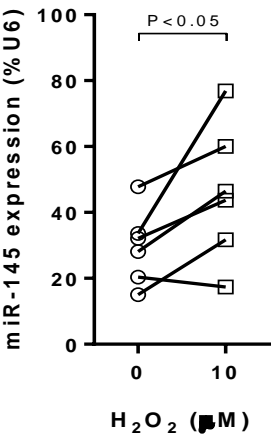

**Supplementary Figure 2: Stimulation of miR-145 by oxidative stress.** Cells were cultured in serum free media supplemented with 10 μM H<sub>2</sub>O<sub>2</sub> for 6 h, and the expression of miR-145 quantified using RT-PCR (n=5).

**FIGURE 3**

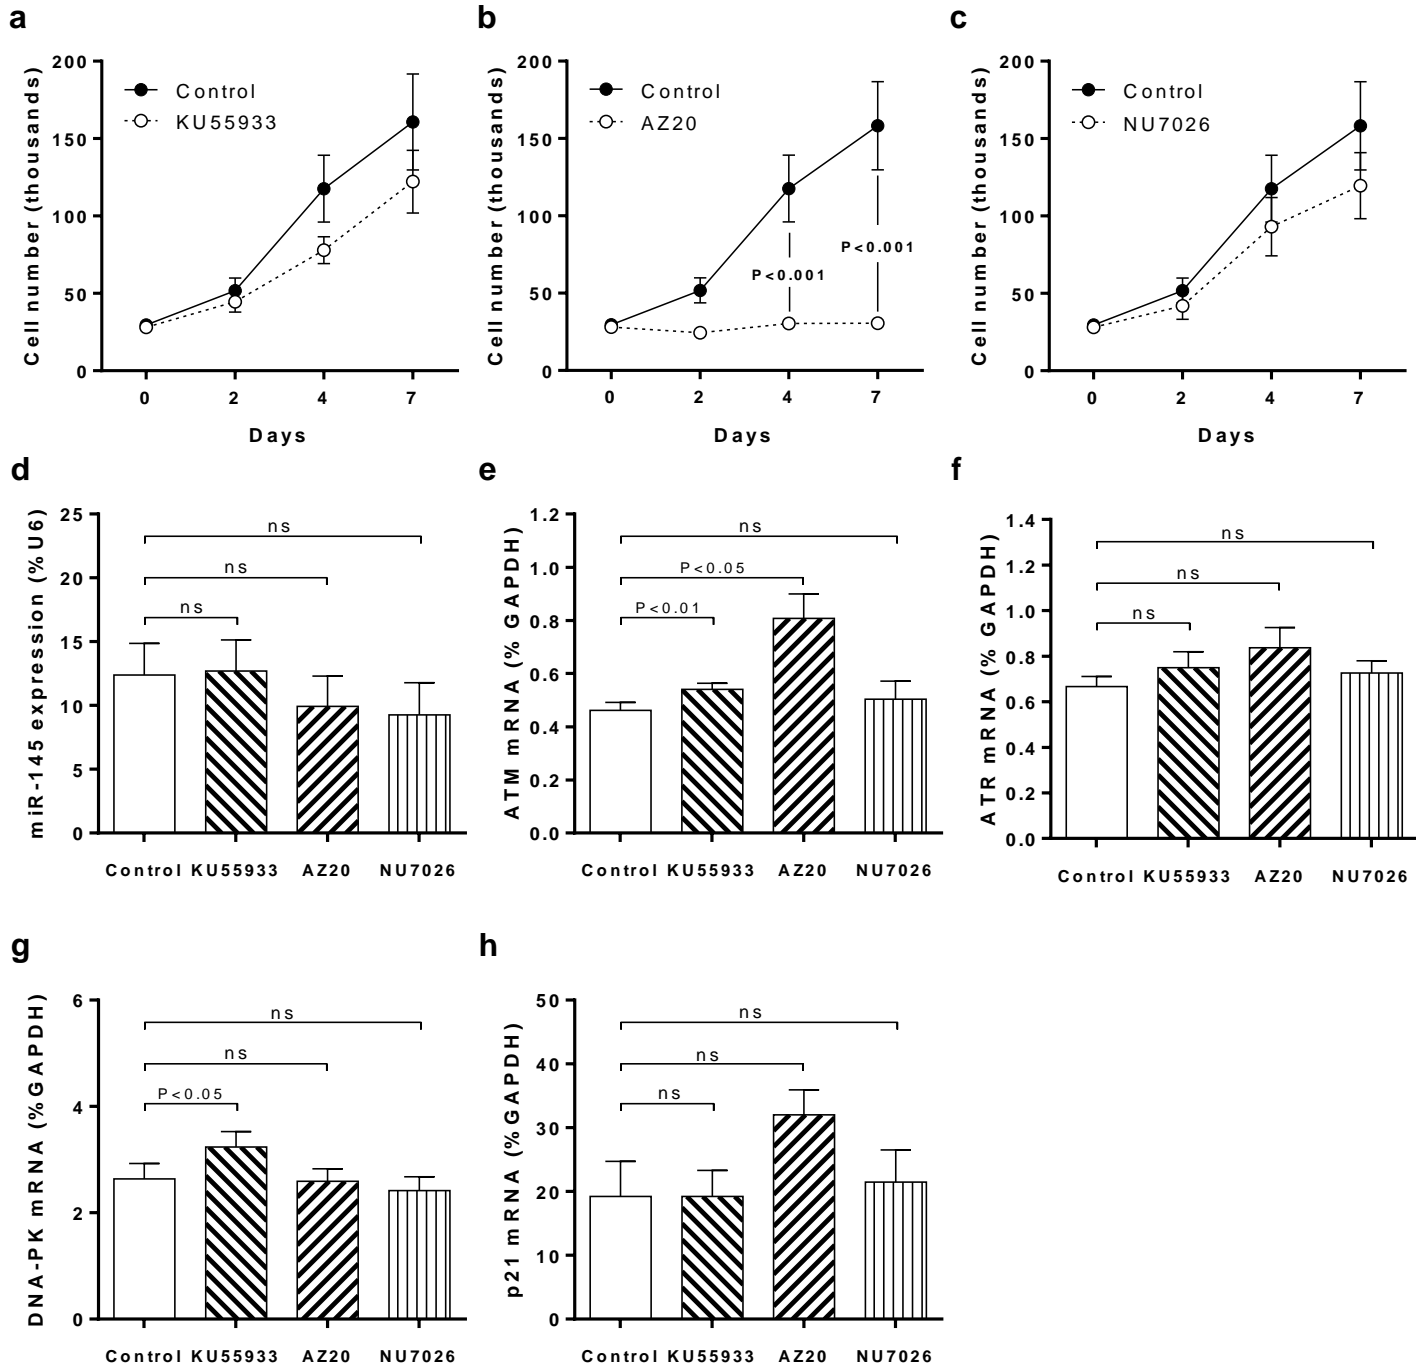

### SUPPLEMENTARY FIGURE 3

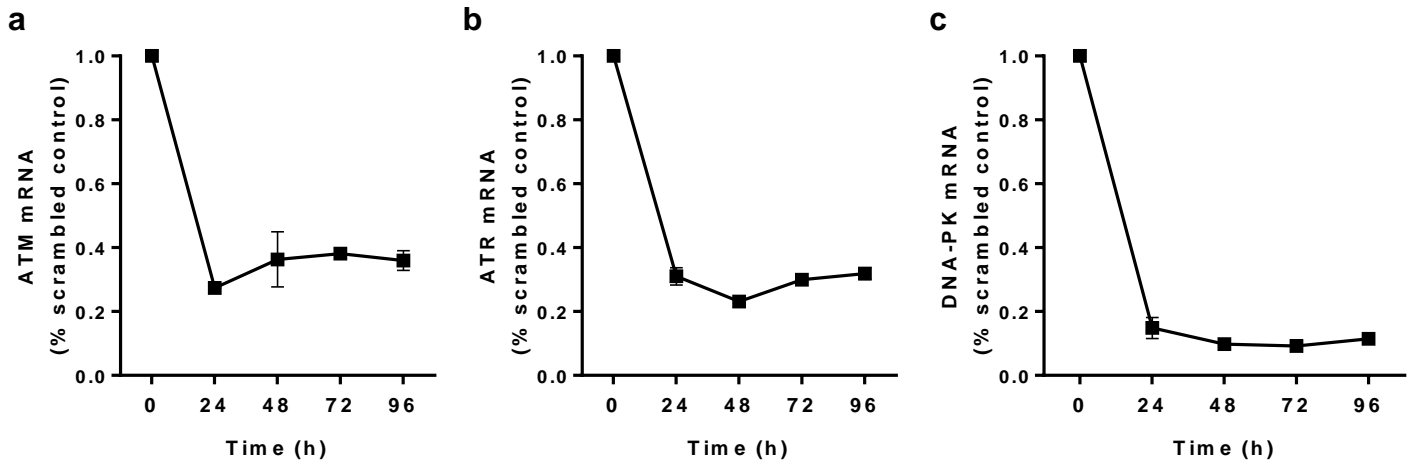

**Supplementary Figure 3: siRNA knockdown of ATM, ATR and DNA-PK has a prolonged inhibition on mRNA levels.** Cells were transfected with 20nM siRNA for 6 hours. RNA was harvested at 24, 48, 72 and 96 h to confirm levels of knockdown for (A) ATM, (B) ATR and (C) DNA-PK (all n=2).

**FIGURE 4**

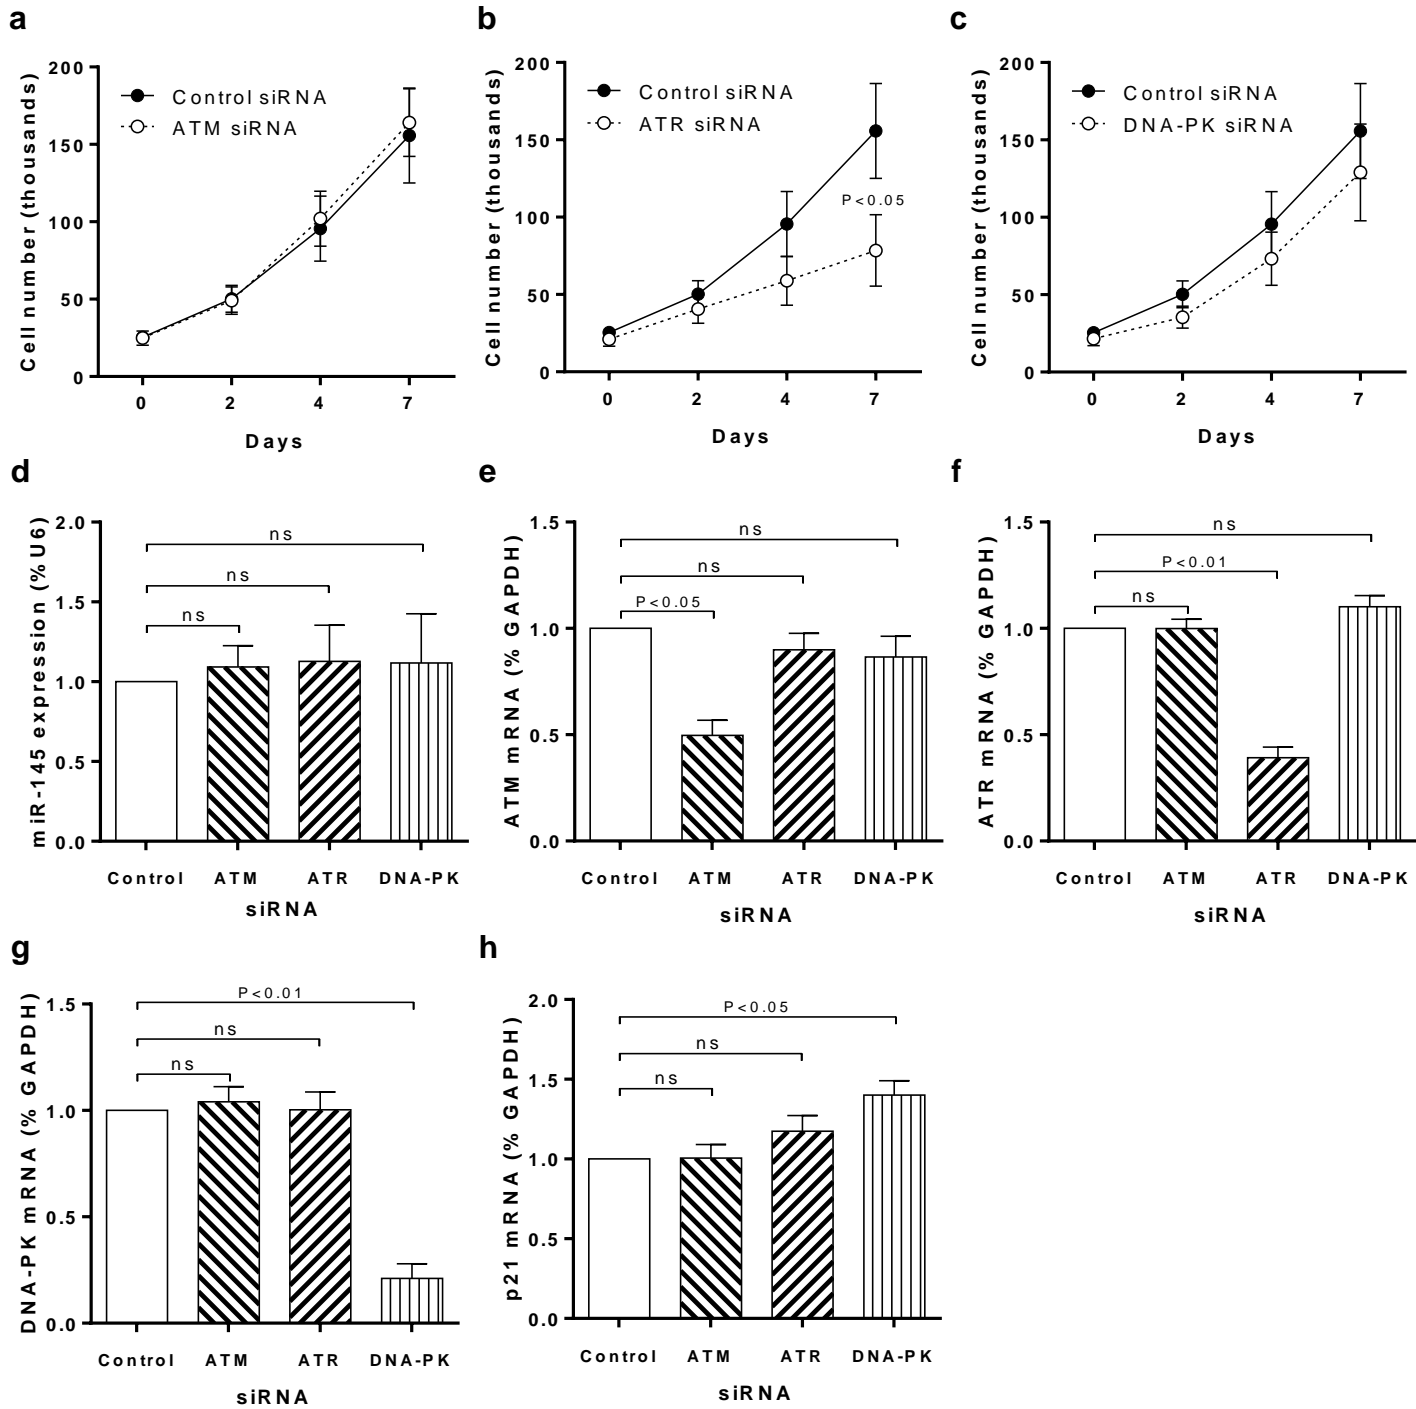

**SUPPLEMENTARY FIGURE 4**

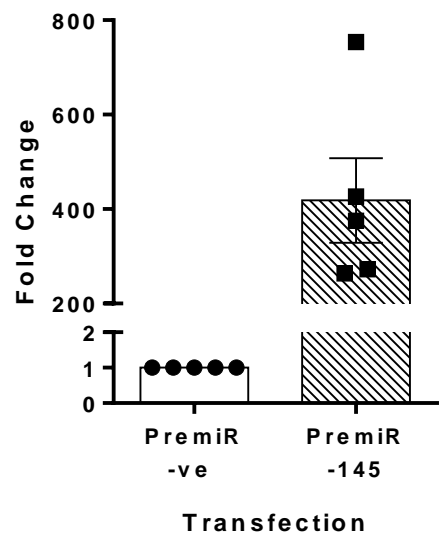

**Supplementary Figure 4: PremiR-145 induces expression of miR-145.** Cells were transfected with 15 nM siRNA for 6 hours. RNA was harvested at 48 h to confirm induction of miR-145 (n=5).



**FIGURE 5**

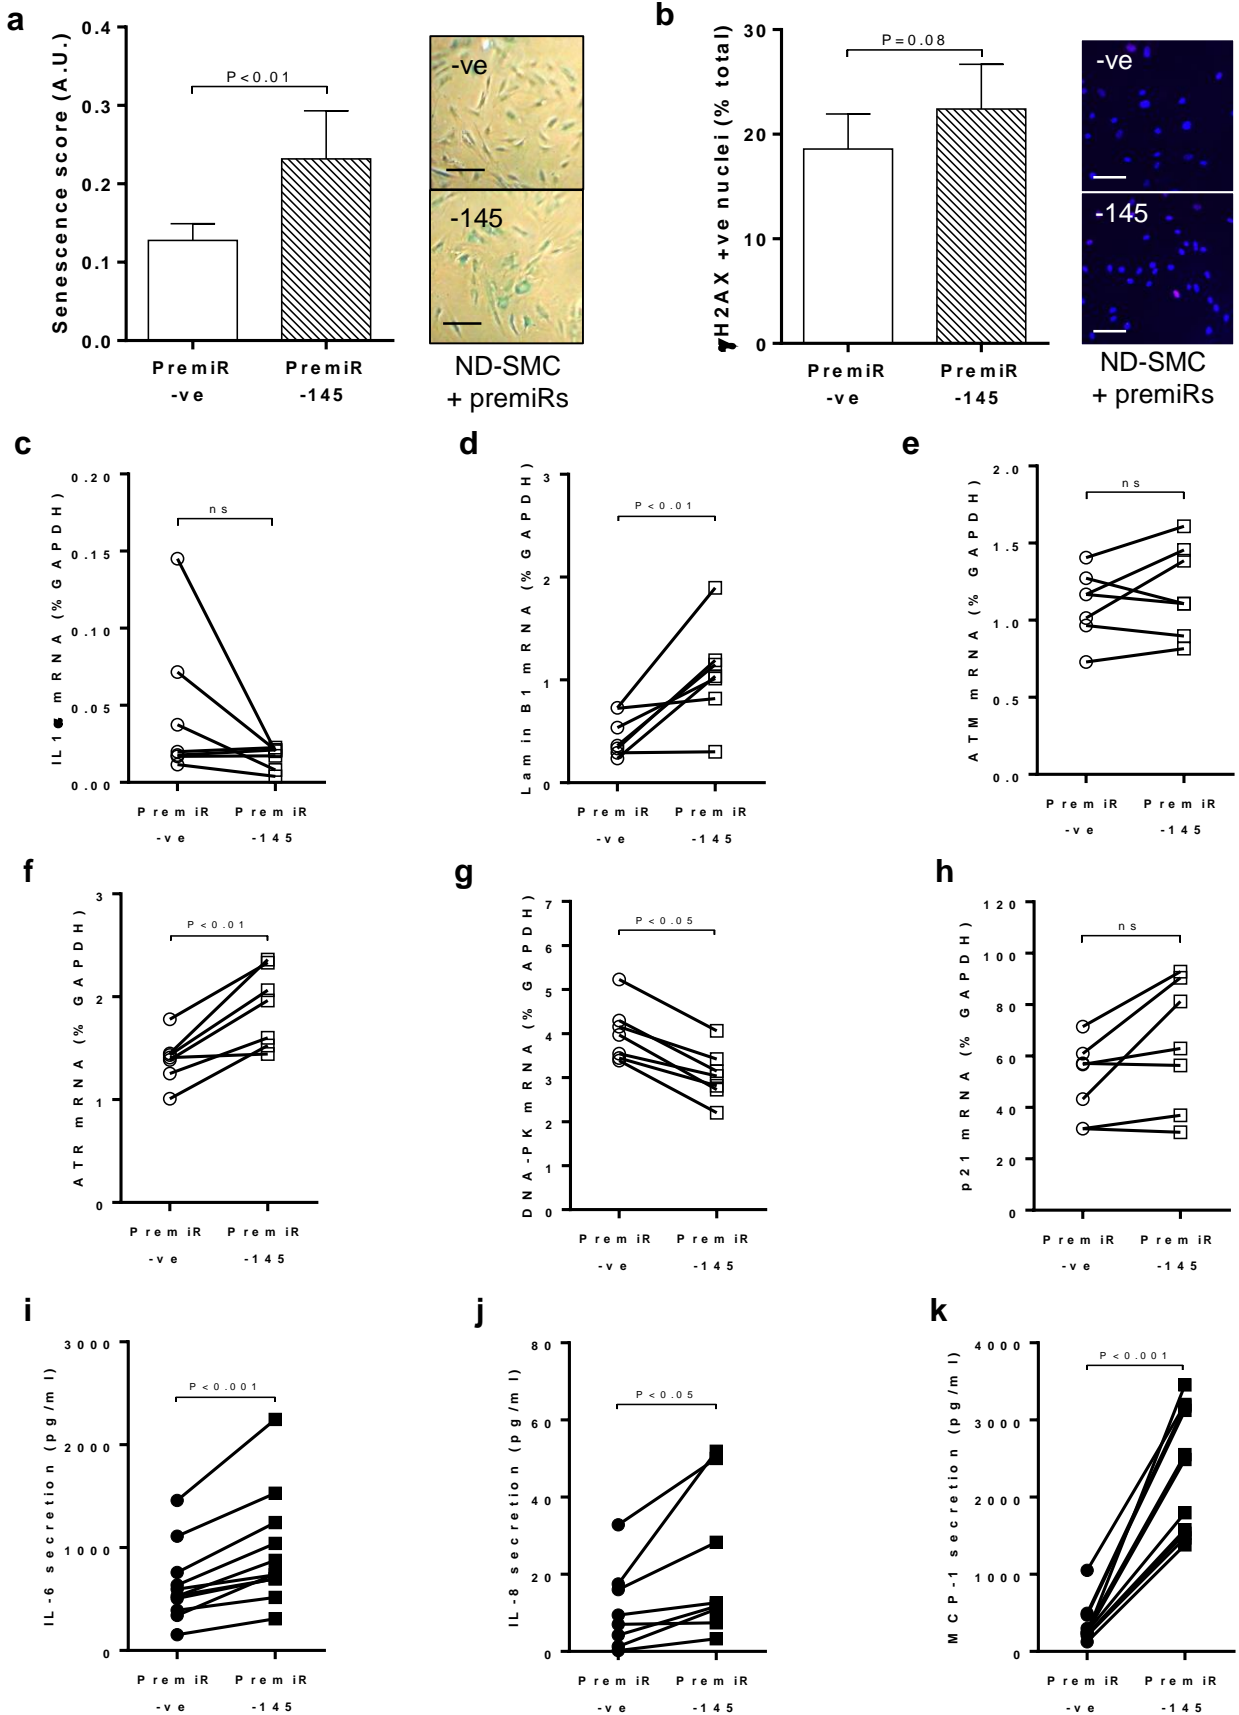

**FIGURE 6**

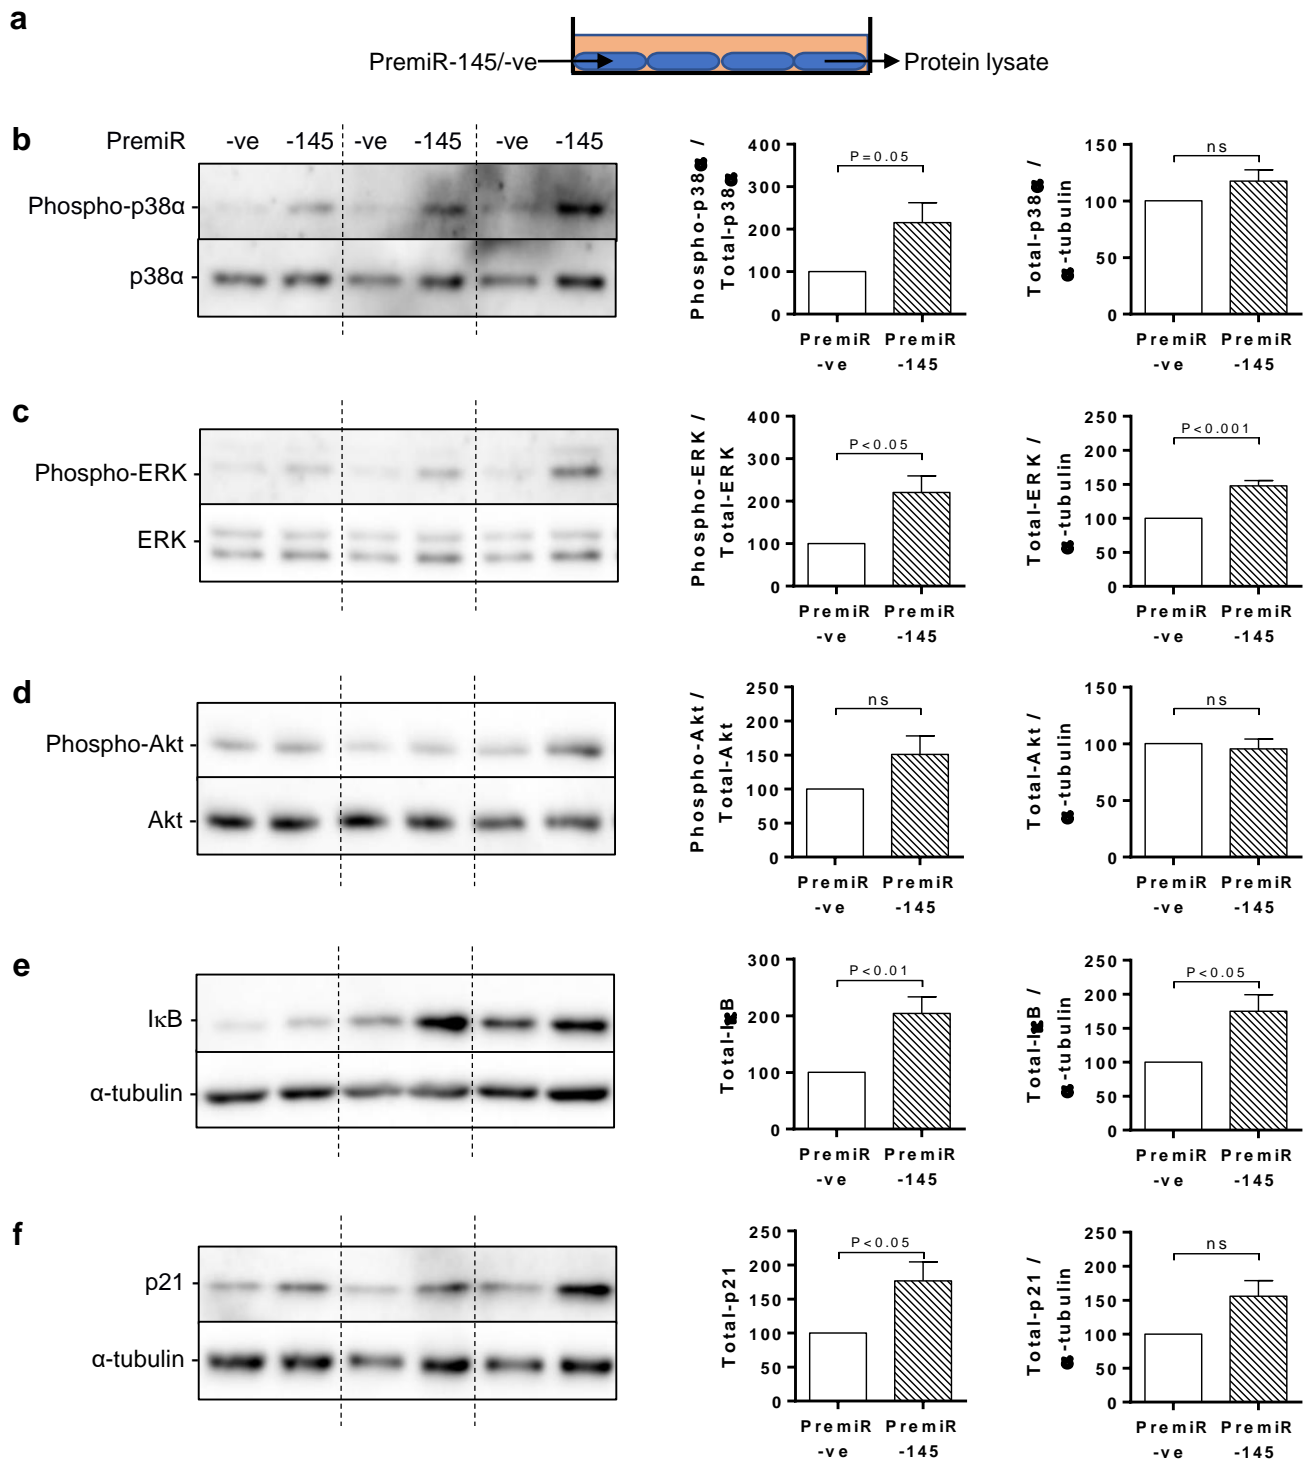

# FIGURE 7

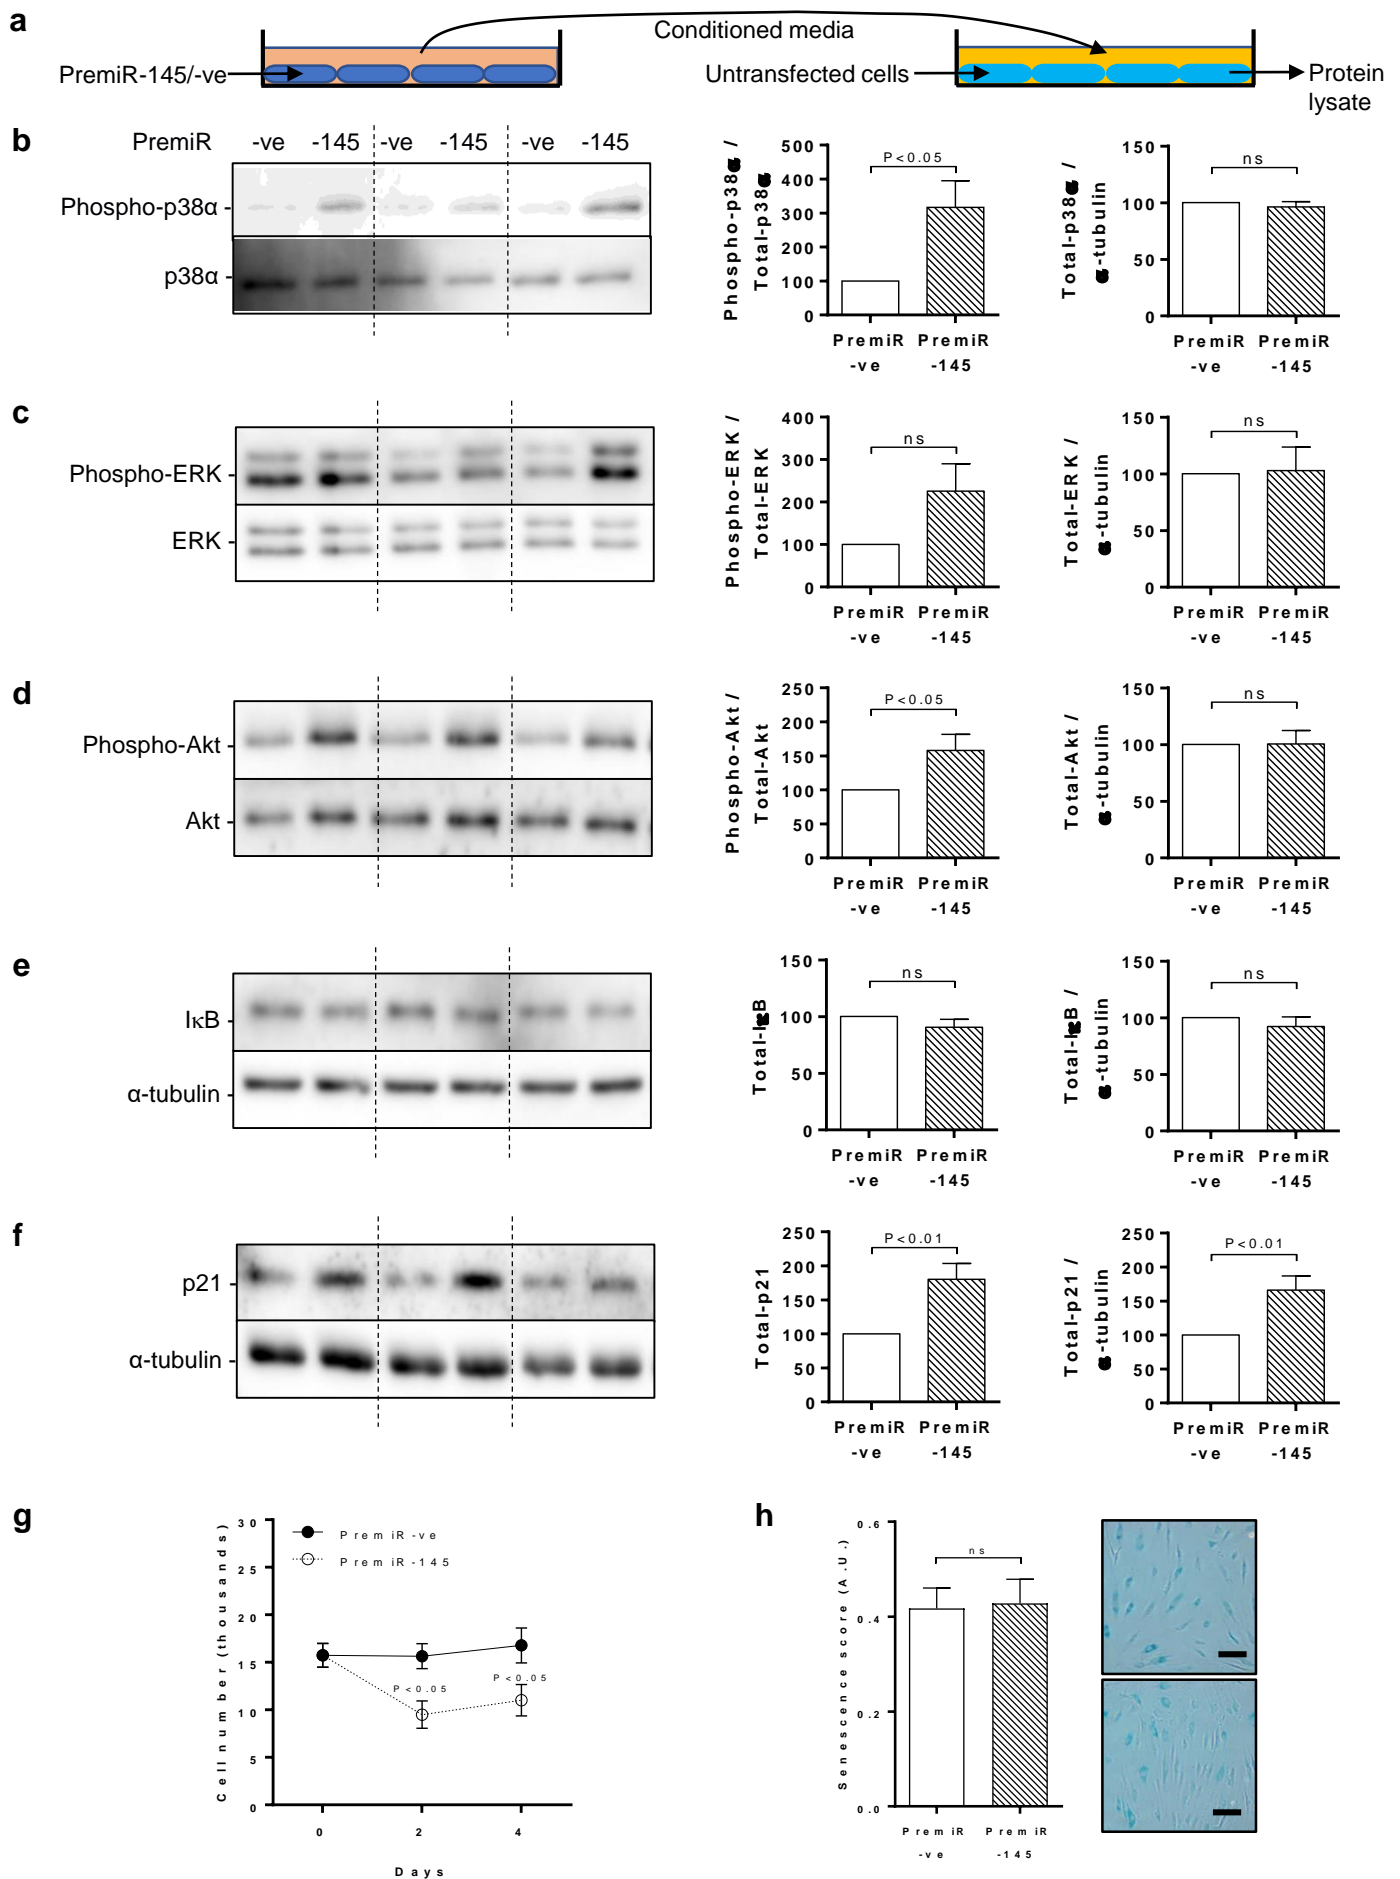

### FIGURE 8

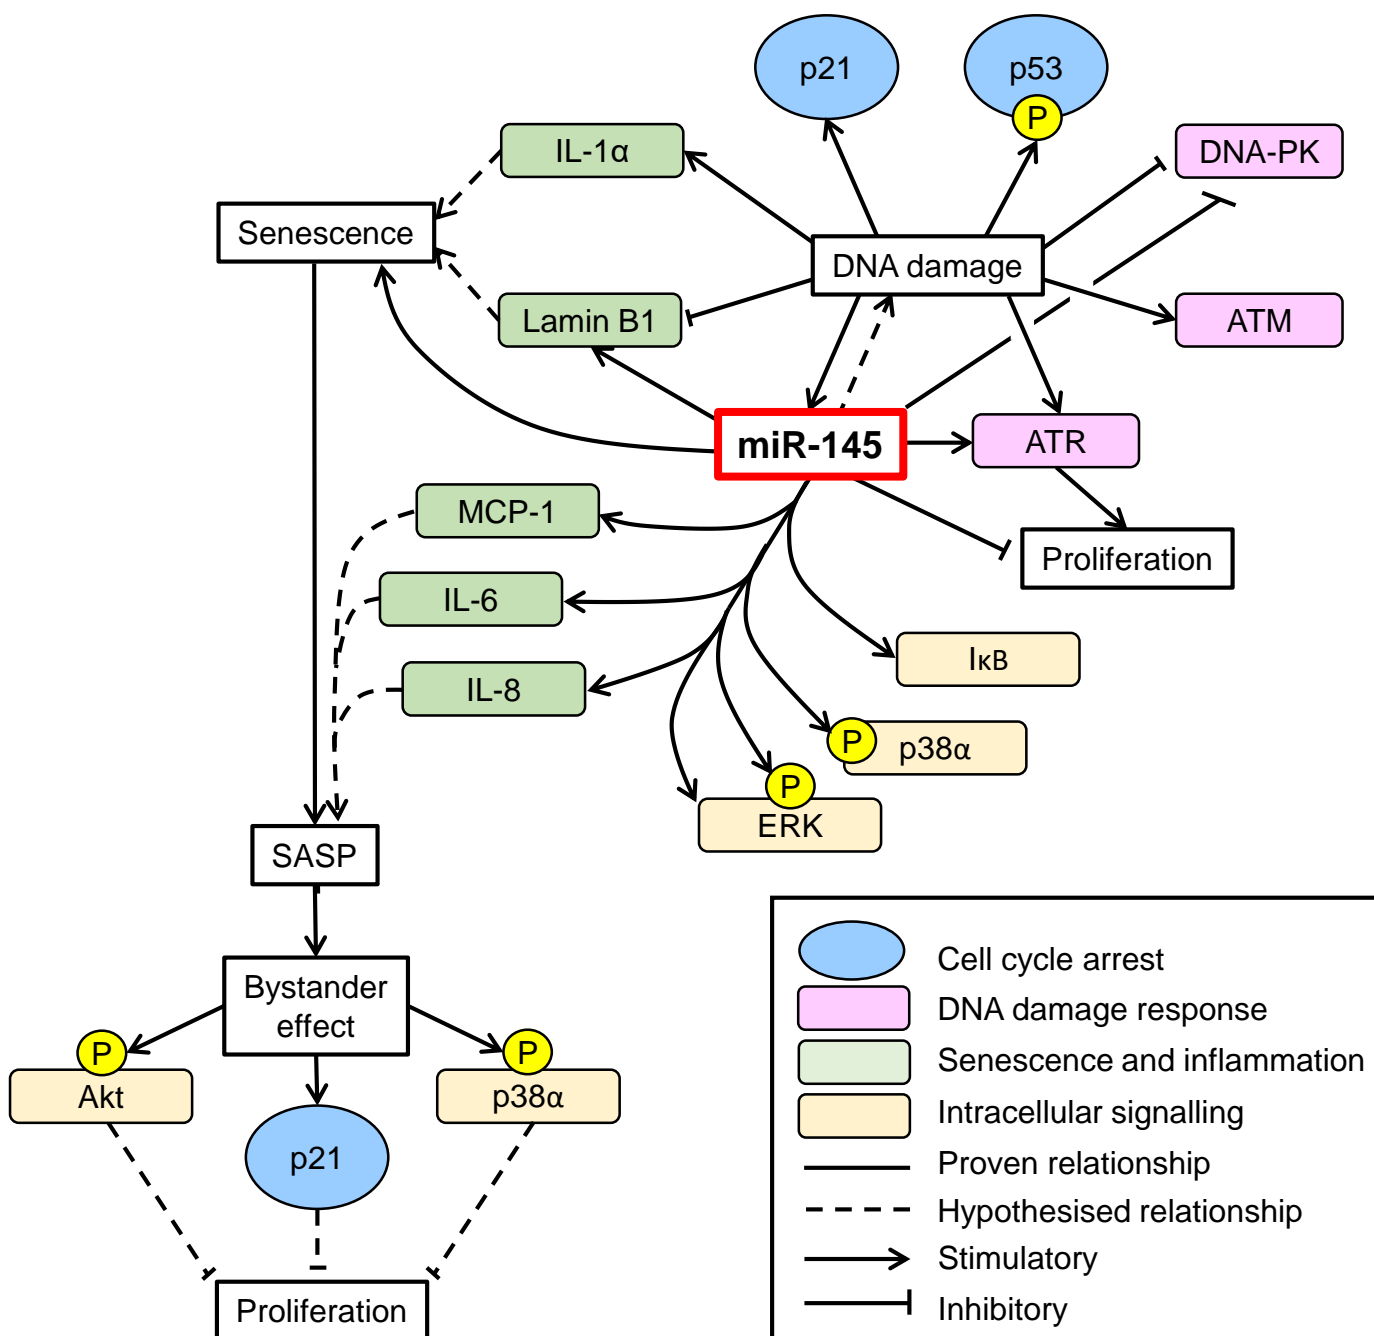

Supplement: s1 [file s1]
